# Supplementary material
Source: MDPI journal article supplement (https://www.mdpi.com/1999-4907/12/12/1795)

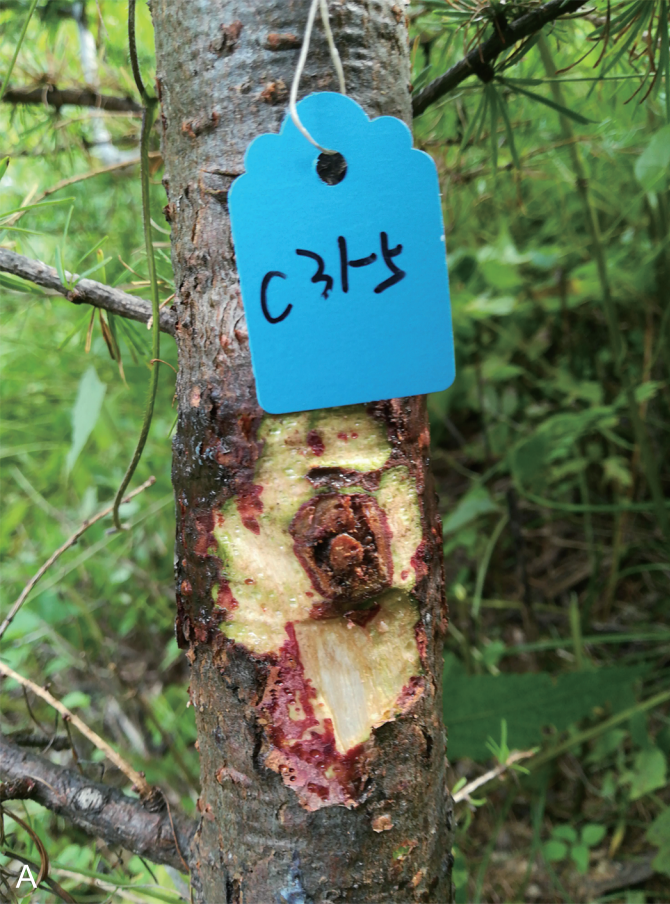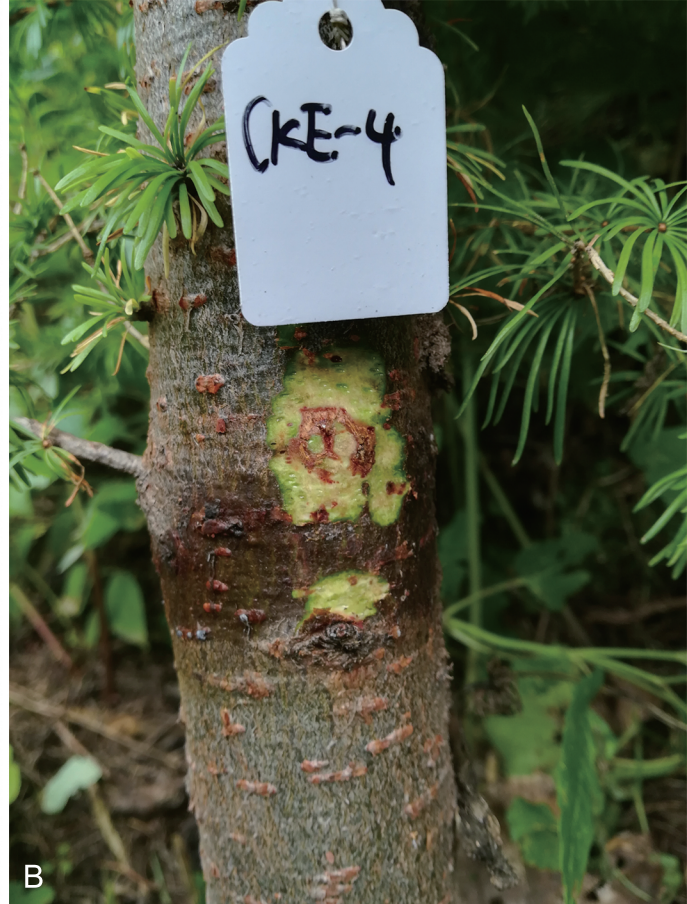

Supplement: s1 [file s1]

ITS

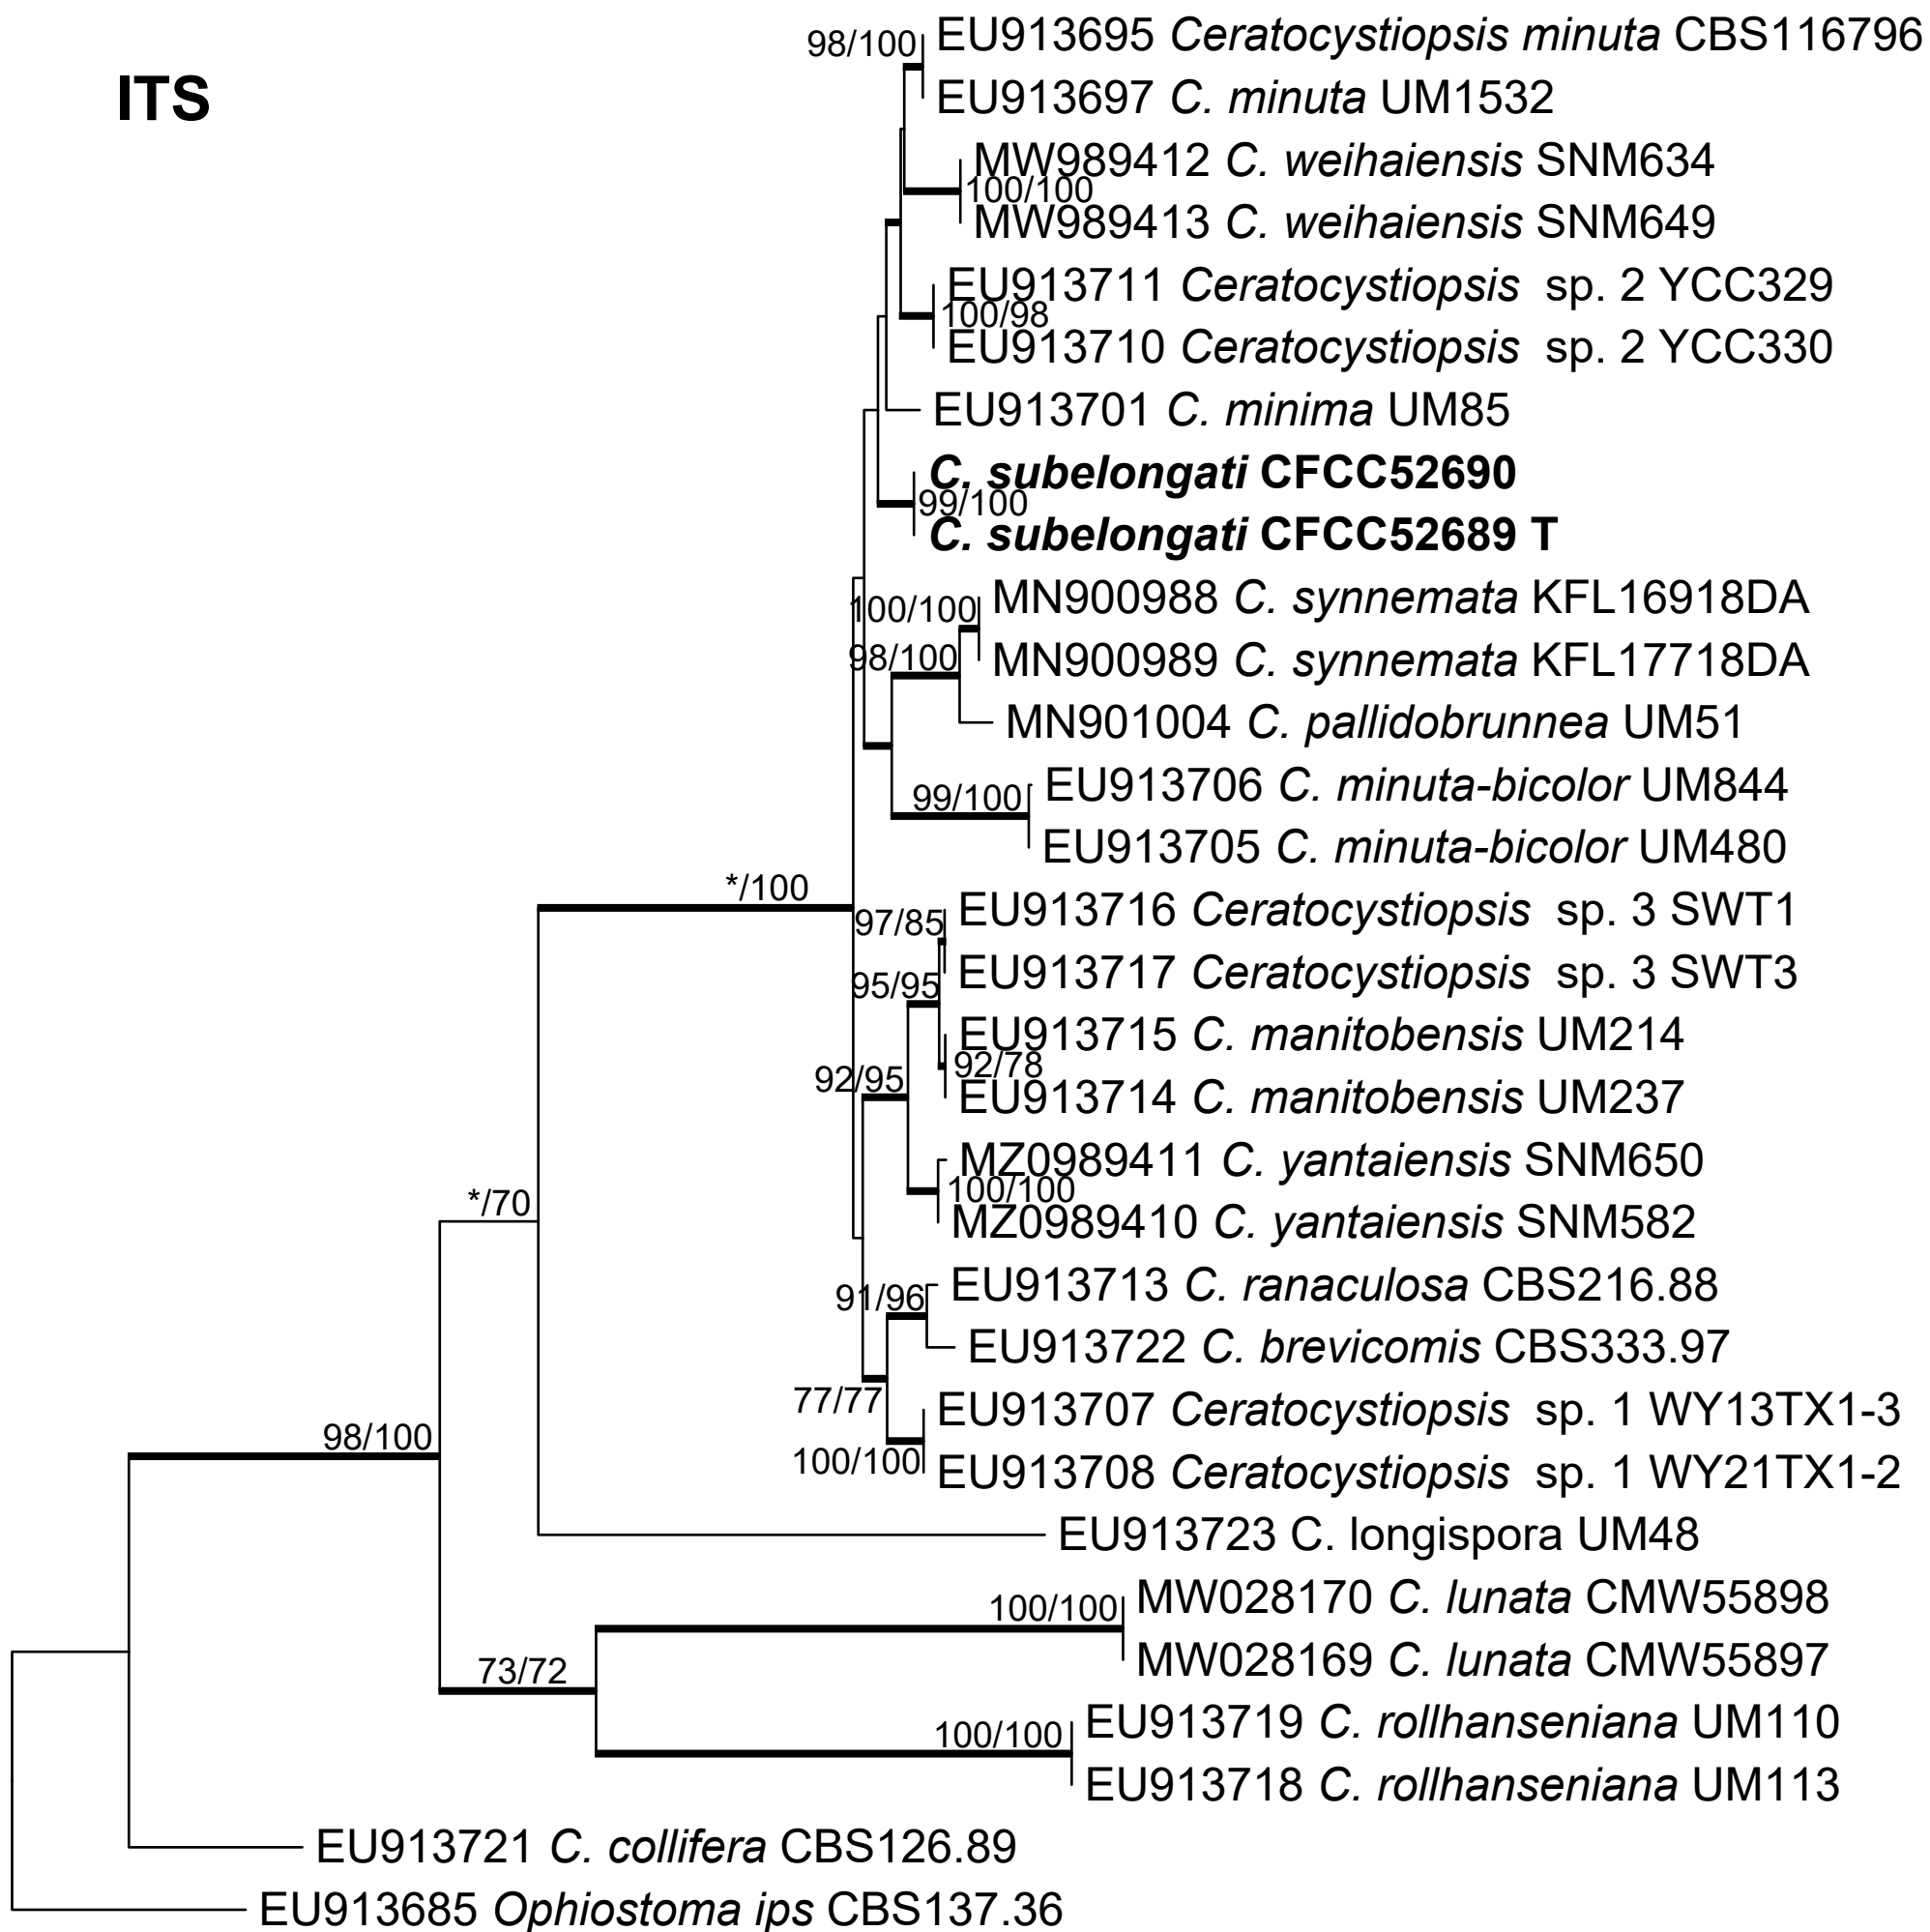

Supplement: s1 [file s1]

# TUB2

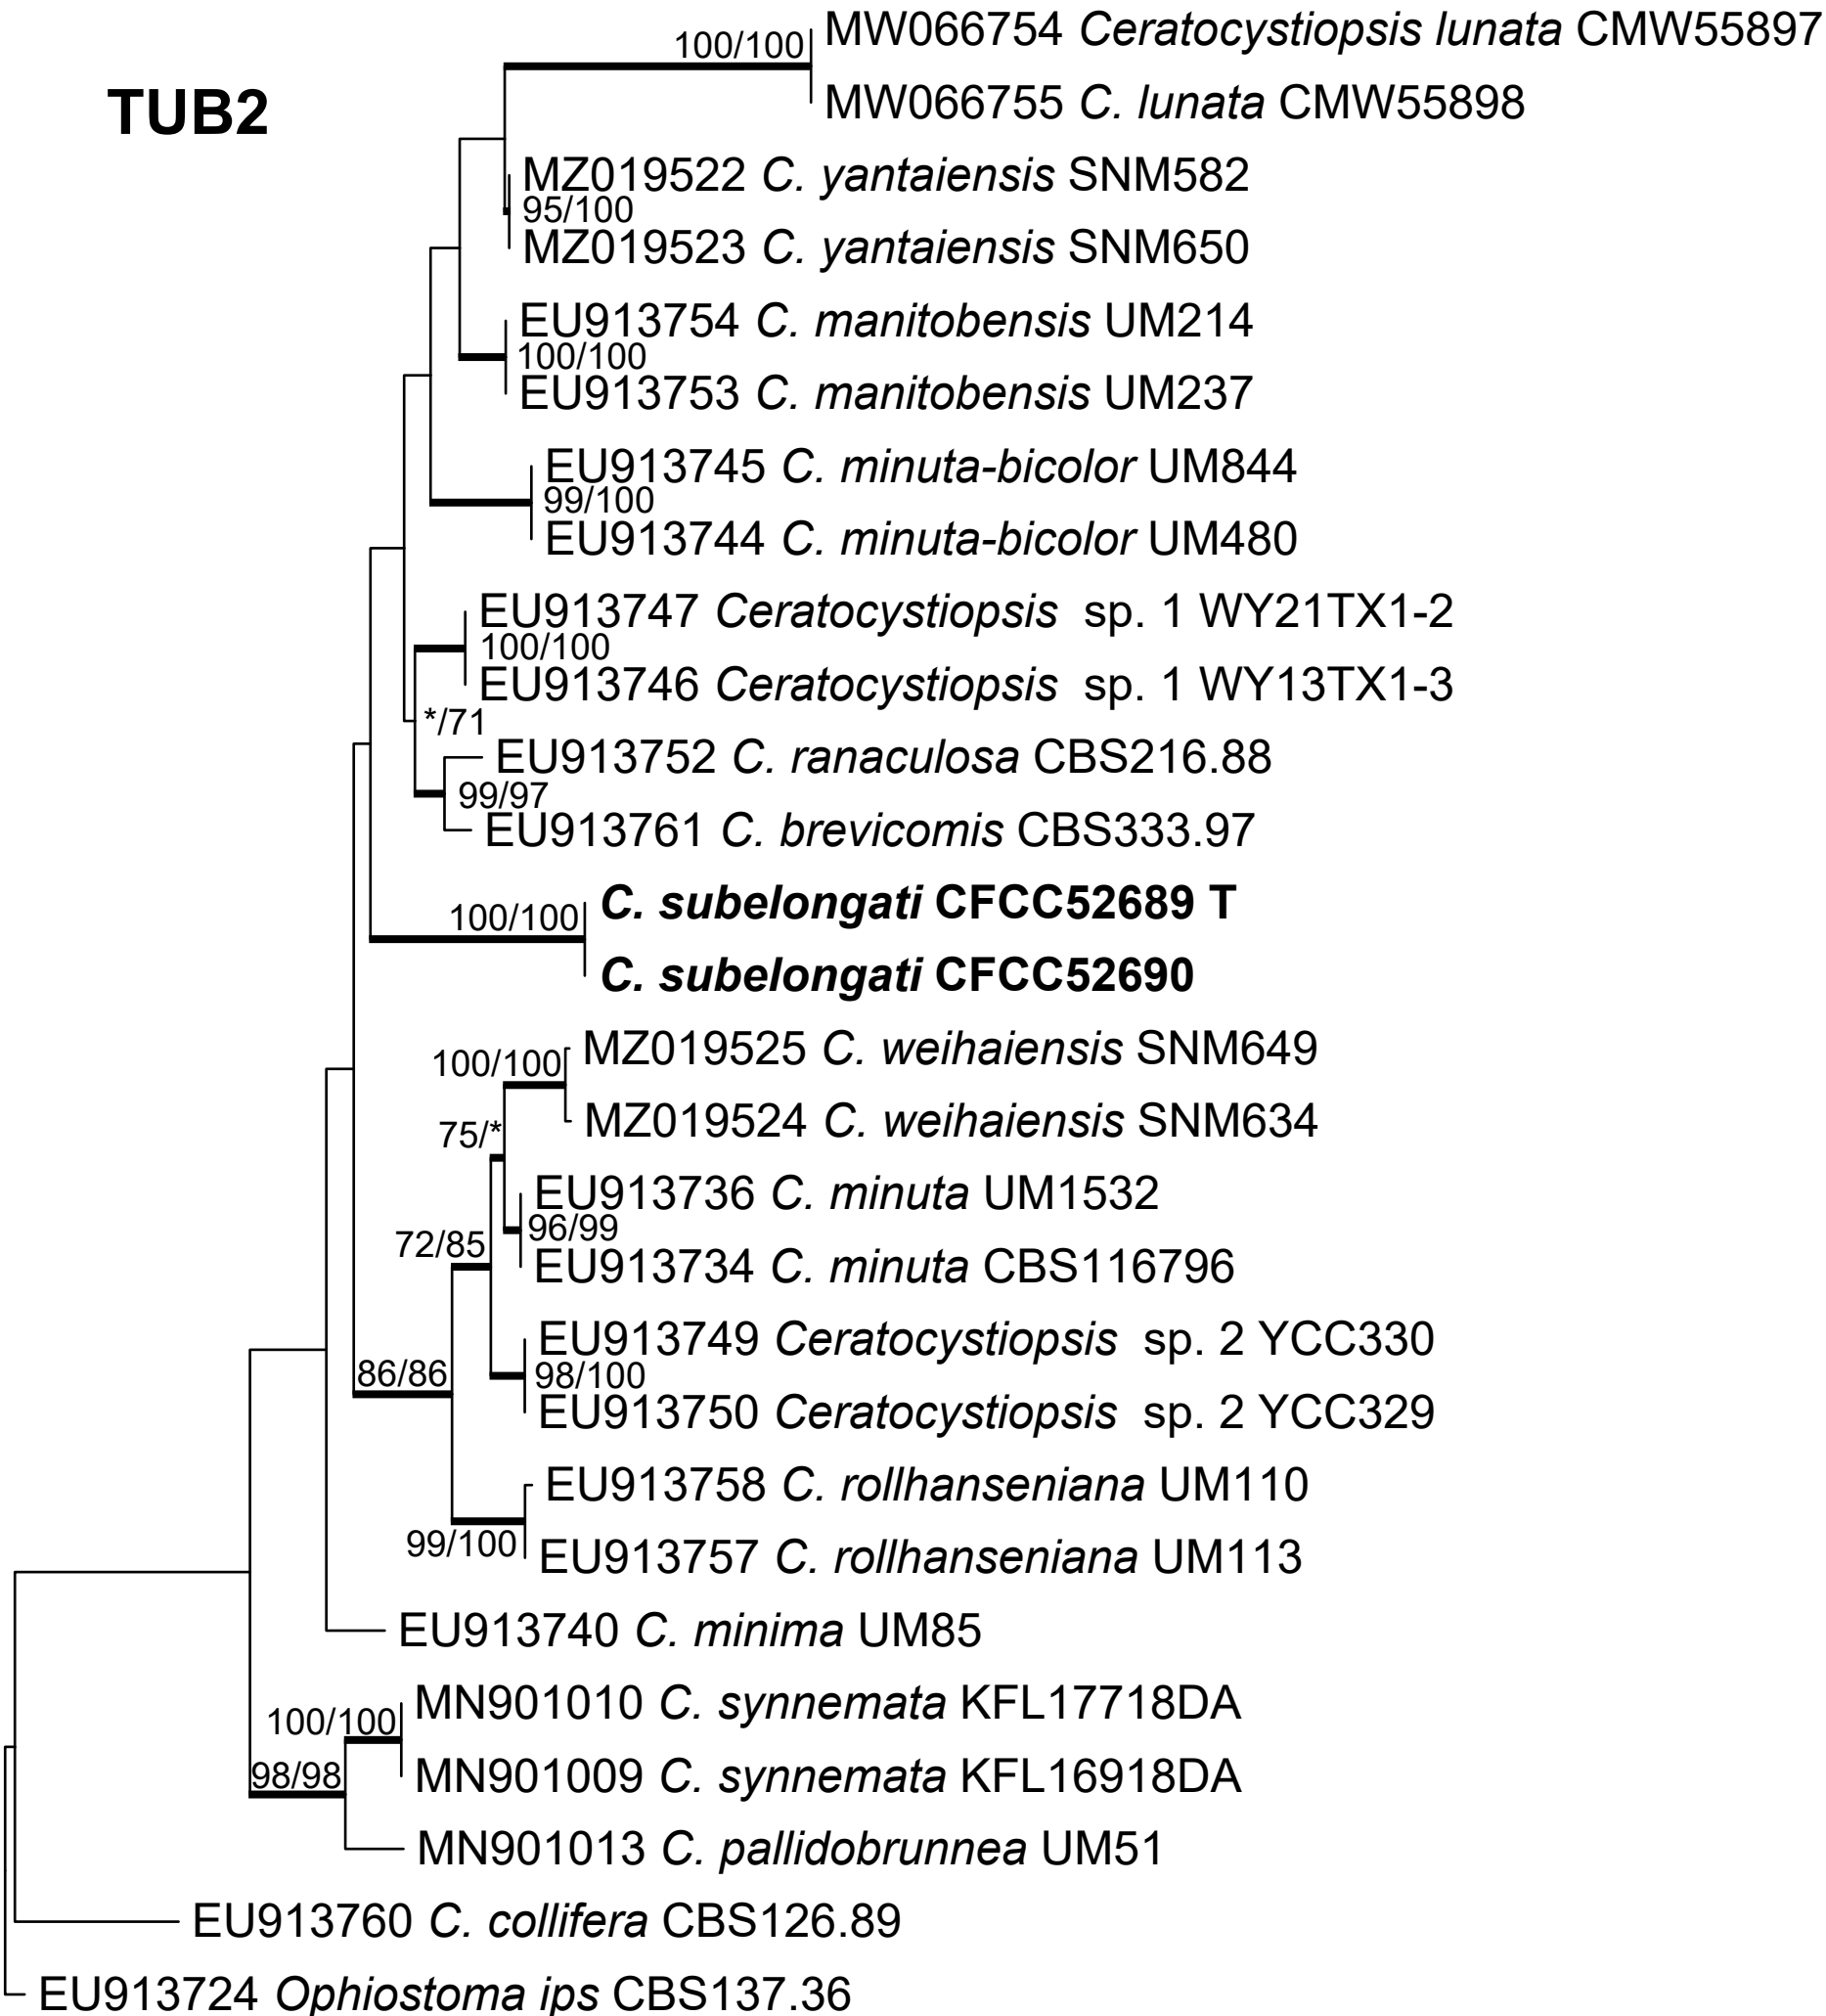

Supplement: s1 [file s1]
